# Supplementary material for: A low-frequency IL4R locus variant in Japanese patients with intravenous immunoglobulin therapy-unresponsive Kawasaki disease
Source: PubMed Central journal article supplement (PMC6610867; doi:10.1186/s12969-019-0337-2), 2019-07-03
Supplement: 12969_2019_337_MOESM1_ESM.pdf [file 12969_2019_337_MOESM1_ESM.pdf]

# **Supplemental Material**

Primer sequence used for library construction for next generation sequencing in *IL4R* locus

| Targeted region (GCRh38) | Primer sequence                                                                              | Amplicon size(bp) |
|--------------------------|----------------------------------------------------------------------------------------------|-------------------|
| chr16:27308945-27318883  | 5'-CTAGAGTGGCTAAAATCCTCAAACCTGACAATATCAAAAGC-3'<br>5'-TTTGCTTTGCAGGCCGAGAGGCTCTAAGACC-3'     | 9939              |
| chr16:27318605-27328663  | 5'-CTAGCTCTGACTGACTCATTCTCTCTTTAGGTGC-3'<br>5'-GAGCTTTATGTCTGCTGTGCTCACTGCTTTATCC-3'         | 10059             |
| chr16:27328577-27339372  | 5'-TATGTTTATTGTACACATGCTATGCCTGTGTCAGGCAC-3'<br>5'-TCCATATAGGCTGCTATAACAAAATACCTTAGAGCAGG-3' | 10796             |
| chr16:27339280-27349114  | 5'-AGATGCACACCATTGCACCCAATAGAGCAATACG-3'<br>5'-TCACTAAATTCTTTATGTTTCAGCTCTGTTCTTGGGAAGG-3'   | 9835              |
| chr16:27349009-27358894  | 5'-AGGCAGAAGAATGAAGTCCAGCTTCTCTTGTGG-3'<br>5'-TGTTGATCTCTGAATTATTGACAGGTGAACGCTCC-3'         | 9886              |
| chr16:27358724-27366771  | 5'-ATCTGTAGAATAGGGTTAGCAATAGAATCCATGTCACC-3'<br>5'-GATAATCATTGAGCCTCCAACTAGAGCTGTTTGG-3'     | 8048              |

Primer sequence used for individual genotyping by Sanger DNA sequencing

| Target SNV  | primer                                        | application            |
|-------------|-----------------------------------------------|------------------------|
| rs563535954 | 5'-TAATTCTTGTAGAGATGTTTGAGACGGCTTGGGCTC-3'    | amplify the SNV region |
|             | 5'-GGATTACTTCCTAAATCAACTATTTGAATCCTTGTATGG-3' | sequencing             |
|             | 5'-TGTGCGGCCACCTGAAACAGTGTC-3'                | sequencing             |
| rs193167358 | 5'-TCAGGCAGCCAAAGGTGGAATAGTAACATCTGG-3'       | amplify the SNV region |
|             | 5'-CATGTTTTTCAGGGAGGCAGTGAAGCTGTGG-3'         | sequencing             |
|             | 5'-TATTTATGTGACCTGGCAGATCTCTG-3'              | sequencing             |
| rs538765536 | 5'-AGAAGCGGTCCCAGGCCAGGAACC-3'                | amplify the SNV region |
|             | 5'-TGGAAAGGCATCTCTTTGGCAGCCTTGTGAGG-3'        | sequencing             |
|             | 5'-TTCTGGAGTATGGAAAGGTCCAGC-3'                | sequencing             |

Primer sequence used for allele specific *IL4R* transcript quantification

5'-TGGAAGGCAGCCAGGCTGGCAGATTTTC-3'

5'-CTCCCTGAAGTTCAATTTCTCATCGATTTCCCAAGG-3'

**Supplementary Table 1.** List of primers used in this study.



**Supplementary Table 3.** A list of 206 SNVs and 8 Indels in the gene loci of cytokine receptors detected in 30 IVIG-unresponsive KD patients (read depth >450, detected AAF >0.05).

| gene            | Chr | GCRh38 position | rs_number   | IKGP AAF | 1KJPN AAF  | KD AAF | Ref | Alt |
|-----------------|-----|-----------------|-------------|----------|------------|--------|-----|-----|
| <i>TNFRSF1B</i> | 1   | 12207208        | rs1061624   | 0.4565   | 0.4605     | 0.512  | A   | G   |
| <i>TNFRSF1B</i> | 1   | 12207235        | rs3397      | 0.4091   | 0.3462     | 0.429  | C   | T   |
| <i>TNFRSF1B</i> | 1   | 12207407        | rs5746065   | 0.1575   | 0.1391     | 0.14   | C   | A   |
| <i>TNFRSF1B</i> | 1   | 12207858        | rs5746070   | 0.0256   | 0.07242991 | 0.101  | C   | G   |
| <i>TNFRSF1B</i> | 1   | 12207942        | rs1061628   | 0.3592   | 0.2869     | 0.268  | C   | T   |
| <i>TNFRSF1B</i> | 1   | 12208442        | rs1061631   | 0.1154   | 0.1479     | 0.152  | G   | A   |
| <i>IL23R</i>    | 1   | 67259437        | rs10889677  | 0.3926   | 0.6964     | 0.734  | C   | A   |
| <i>IL23R</i>    | 1   | 67259964        | -           | -        | -          | 0.054  | G   | A   |
| <i>IL12RB2</i>  | 1   | 67395837        | rs2229546   | 0.5551   | 0.4045     | 0.345  | C   | A   |
| <i>IL12RB2</i>  | 1   | 67396783        | rs1874396   | 0.8391   | 0.7706     | 0.688  | G   | T   |
| <i>IL12RB2</i>  | 1   | 67396980        | -           | -        | -          | 0.16   | TA  | -   |
| <i>IL6R</i>     | 1   | 154465420       | rs2229238   | 0.7969   | 0.8145     | 0.866  | T   | C   |
| <i>IL6R</i>     | 1   | 154465608       | rs7514452   | 0.7947   | 0.812      | 0.863  | C   | T   |
| <i>IL6R</i>     | 1   | 154466404       | rs4072391   | 0.7552   | 0.8113     | 0.859  | T   | C   |
| <i>IL6R</i>     | 1   | 154467389       | rs4379670   | 0.7959   | 0.8227     | 0.846  | T   | A   |
| <i>IL6R</i>     | 1   | 154469622       | -           | -        | -          | 0.05   | A   | G   |
| <i>IL1R2</i>    | 2   | 102027999       | rs3218984   | 0.2322   | 0.3363     | 0.341  | T   | C   |
| <i>IL1R1</i>    | 2   | 102176300       | rs3917318   | 0.3714   | 0.5897     | 0.6    | A   | G   |
| <i>IL1R1</i>    | 2   | 102177073       | rs3917324   | 0.1665   | 0.18691589 | 0.132  | C   | G   |
| <i>IL1R1</i>    | 2   | 102177757       | rs3732134   | 0.0581   | 0.1565     | 0.174  | C   | G   |
| <i>IL1R1</i>    | 2   | 102177822       | rs2110726   | 0.2554   | 0.3402     | 0.358  | G   | A   |
| <i>IL1R1</i>    | 2   | 102178143       | rs3732131   | 0.1821   | 0.2053     | 0.248  | A   | G   |
| <i>IL1R1</i>    | 2   | 102180064       | rs3917332   | 0.877    | 0.9958     | 1      | A   | T   |
| <i>IL1RL2</i>   | 2   | 102239102       | rs375155562 | -        | -          | 0.107  | A   | T   |
| <i>IL18R1</i>   | 2   | 102396972       | rs3771157   | 0.0687   | 0.0921     | 0.137  | C   | A   |
| <i>IL18R1</i>   | 2   | 102397290       | rs3732127   | 0.1887   | 0.1636     | 0.243  | G   | C   |
| <i>IL18R1</i>   | 2   | 102397502       | rs3732126   | 0.2344   | 0.1271028  | 0.414  | A   | C   |
| <i>IL18R1</i>   | 2   | 102397503       | rs3732125   | 0.2346   | 0.13364486 | 0.414  | G   | C   |
| <i>IL18R1</i>   | 2   | 102397842       | rs1135354   | 0.2552   | 0.3523     | 0.414  | T   | G   |
| <i>IL18R1</i>   | 2   | 102398236       | rs1568681   | 0.6871   | 0.5631     | 0.687  | C   | T   |
| <i>IL18R1</i>   | 2   | 102399227       | rs1420094   | 0.4321   | 0.2107     | 0.263  | C   | T   |
| <i>IL18RAP</i>  | 2   | 102452327       | rs7559479   | 0.6935   | 0.5586     | 0.724  | G   | A   |
| <i>IL5RA</i>    | 3   | 3066399         | rs340828    | 0.3496   | 0.2474     | 0.195  | G   | A   |
| <i>IL5RA</i>    | 3   | 3066558         | rs340829    | 0.3584   | 0.2577     | 0.272  | T   | G   |
| <i>IL5RA</i>    | 3   | 3066596         | rs55865625  | 0.0375   | 0.0864     | 0.118  | C   | G   |
| <i>IL5RA</i>    | 3   | 3066953         | rs340830    | 0.7354   | 0.4729     | 0.389  | T   | C   |
| <i>IL5RA</i>    | 3   | 3067760         | rs340831    | 0.6901   | 0.3952     | 0.389  | C   | T   |
| <i>IL5RA</i>    | 3   | 3067948         | rs340832    | 0.357    | 0.23411215 | 0.228  | G   | C   |
| <i>IL5RA</i>    | 3   | 3068553         | rs6768065   | 0.4143   | 0.2271028  | 0.281  | A   | T   |
| <i>IL5RA</i>    | 3   | 3069774         | rs340833    | 0.4247   | 0.2292     | 0.246  | G   | A   |
| <i>IL17RE</i>   | 3   | 9915210         | rs693802    | 0.3744   | 0.0684     | 0.104  | C   | T   |
| <i>IL17RE</i>   | 3   | 9915771         | rs1056286   | 0.3397   | 0.0688     | 0.117  | C   | T   |
| <i>IL17RE</i>   | 3   | 9916214         | rs8883      | 0.4257   | 0.06074766 | 0.125  | G   | A   |
| <i>IL17RC</i>   | 3   | 9933125         | rs76999397  | 0.0308   | 0.0412     | 0.077  | G   | A   |
| <i>IL17RC</i>   | 3   | 9933563         | rs183956    | 0.9872   | 0.9972     | 1      | C   | G   |
| <i>IL17RC</i>   | 3   | 9933669         | rs279551    | 0.9974   | 1          | 1      | A   | G   |
| <i>IL17RC</i>   | 3   | 9933702         | rs2270894   | 0.3013   | 0.52009346 | 0.299  | C   | G   |
| <i>TGFBR2</i>   | 3   | 30691365        | -           | -        | -          | 0.265  | C   | T   |
| <i>IL17RD</i>   | 3   | 57089503        | -           | -        | -          | 0.05   | T   | A   |
| <i>IL17RD</i>   | 3   | 57089517        | -           | -        | -          | 0.054  | A   | G   |
| <i>IL17RD</i>   | 3   | 57090490        | rs4681949   | 0.3986   | 0.1        | 0.074  | C   | T   |
| <i>IL17RD</i>   | 3   | 57090563        | rs4681950   | 0.3986   | 0.10981308 | 0.099  | G   | A   |
| <i>IL17RD</i>   | 3   | 57091073        | rs2035656   | 0.2095   | 0.3425     | 0.312  | A   | C   |
| <i>IL17RD</i>   | 3   | 57091174        | rs2035655   | 0.2632   | 0.3667     | 0.316  | T   | G   |
| <i>IL17RD</i>   | 3   | 57091352        | rs9311641   | 0.8594   | 0.528      | 0.493  | C   | T   |
| <i>IL17RD</i>   | 3   | 57091396        | rs17289035  | 0.2628   | 0.3673     | 0.335  | G   | A   |
| <i>IL17RD</i>   | 3   | 57091699        | rs11927968  | 0.222    | 0.0762     | 0.082  | T   | A   |
| <i>IL17RD</i>   | 3   | 57091836        | rs12486855  | 0.2063   | 0.3425     | 0.325  | A   | G   |
| <i>IL17RD</i>   | 3   | 57092463        | rs146995638 | 0.2039   | -          | 0.235  | -   | C   |
| <i>IL17RD</i>   | 3   | 57093963        | rs2035653   | 0.7919   | 0.5262     | 0.499  | G   | A   |
| <i>IL17RD</i>   | 3   | 57094183        | rs11920551  | 0.1563   | 0.0594     | 0.053  | G   | A   |
| <i>IL17RD</i>   | 3   | 57096616        | rs56914717  | 0.2226   | -          | 0.317  | A   | -   |
| <i>IL17RD</i>   | 3   | 57096953        | rs74494823  | 0.2061   | 0.33598131 | 0.303  | T   | G   |
| <i>IL1RAP</i>   | 3   | 190629325       | -           | -        | -          | 0.058  | T   | A   |
| <i>IL1RAP</i>   | 3   | 190629602       | rs7611887   | 0.9443   | 1          | 1      | C   | T   |
| <i>IL1RAP</i>   | 3   | 190629734       | rs1024946   | 0.6144   | 0.8001     | 0.821  | G   | A   |
| <i>IL1RAP</i>   | 3   | 190629889       | rs1024947   | 0.9441   | 1          | 1      | C   | G   |
| <i>IL1RAP</i>   | 3   | 190629892       | rs1024948   | 0.9441   | 1          | 1      | C   | T   |
| <i>IL1RAP</i>   | 3   | 190630200       | rs1058843   | 0.9447   | 1          | 1      | A   | C   |
| <i>IL1RAP</i>   | 3   | 190649404       | rs41392044  | 0.0294   | 0.0589     | 0.052  | A   | G   |
| <i>IL1RAP</i>   | 3   | 190651042       | rs41419651  | 0.0803   | 0.2986     | 0.179  | C   | T   |
| <i>IL1RAP</i>   | 3   | 190651974       | -           | -        | -          | 0.251  | T   | C   |
| <i>IL1RAP</i>   | 3   | 190657779       | rs80228668  | 0.0839   | 0.30046729 | 0.224  | G   | A   |
| <i>IL1RAP</i>   | 3   | 190658675       | rs79548924  | 0.1729   | 0.3014     | 0.19   | G   | A   |
| <i>IL1RAP</i>   | 3   | 190658775       | rs6763559   | 0.1092   | 0.30186916 | 0.197  | C   | T   |
| <i>IL1RAP</i>   | 3   | 190658862       | rs6763652   | 0.2372   | 0.3687     | 0.261  | C   | A   |
| <i>IL1RAP</i>   | 3   | 190658954       | rs6788031   | 0.7694   | 0.9486     | 0.958  | A   | T   |
| <i>IL1RAP</i>   | 3   | 190658999       | rs6788050   | 0.2372   | 0.3682     | 0.267  | A   | G   |
| <i>KDR</i>      | 4   | 55079656        | rs33978472  | 0.0733   | -          | 0.07   | A   | -   |
| <i>KDR</i>      | 4   | 55079914        | rs4421048   | 0.9928   | 1          | 1      | A   | G   |
| <i>KDR</i>      | 4   | 55080187        | rs10006115  | 0.0725   | 0.0768     | 0.076  | G   | T   |
| <i>IL7R</i>     | 5   | 35877724        | rs9292617   | 0.6697   | 0.4766     | 0.477  | A   | T   |
| <i>IL7R</i>     | 5   | 35877739        | rs10491435  | 0.2372   | 0.0907     | 0.135  | G   | A   |
| <i>IL7R</i>     | 5   | 35877812        | rs10491434  | 0.2646   | 0.0911     | 0.113  | A   | G   |
| <i>IL7R</i>     | 5   | 35878825        | rs6451231   | 0.649    | 0.399      | 0.451  | T   | C   |
| <i>IL7R</i>     | 5   | 35878993        | rs6881270   | 0.2292   | 0.2226     | 0.193  | C   | T   |
| <i>IL7R</i>     | 5   | 35879033        | rs13167136  | 0.1284   | 0.1112     | 0.136  | G   | A   |
| <i>IL7R</i>     | 5   | 35879493        | rs700179    | 0.2646   | 0.0911     | 0.117  | A   | G   |
| <i>IL7R</i>     | 5   | 35879501        | rs1862632   | 0.1286   | 0.1112     | 0.132  | A   | G   |
| <i>LIFR</i>     | 5   | 38474405        | rs2731982   | 0.5909   | 0.707      | 0.785  | T   | C   |
| <i>LIFR</i>     | 5   | 38475405        | rs1046224   | 0.3728   | 0.6712     | 0.711  | G   | A   |
| <i>LIFR</i>     | 5   | 38475925        | rs3822425   | 0.3255   | 0.4341     | 0.572  | T   | C   |
| <i>LIFR</i>     | 5   | 38477539        | rs73077449  | 0.0655   | 0.2428     | 0.177  | C   | A   |

|         |    |           |             |        |            |       |     |    |
|---------|----|-----------|-------------|--------|------------|-------|-----|----|
| LJFR    | 5  | 38477761  | rs34130318  | 0.3223 | 0.434      | 0.542 | G   | C  |
| LJFR    | 5  | 38479725  | rs60287085  | 0.0575 | 0.243      | 0.181 | C   | T  |
| LJFR    | 5  | 38480590  | rs3776424   | 0.0527 | 0.2301     | 0.159 | T   | C  |
| LJFR    | 5  | 38480607  | rs3776425   | 0.0659 | 0.243      | 0.188 | C   | T  |
| LJFR    | 5  | 38481049  | rs3822427   | 0.0577 | 0.2428     | 0.208 | T   | G  |
| LJFR    | 5  | 38481233  | rs1005017   | 0.729  | 0.7144     | 0.782 | C   | T  |
| LJFR    | 5  | 38481271  | rs3797156   | 0.0533 | 0.2299     | 0.184 | C   | T  |
| OSMR    | 5  | 38885818  | rs61166819  | 0.1554 | 0.0748     | 0.09  | C   | T  |
| OSMR    | 5  | 38885916  | rs664176    | 0.2476 | 0.0463     | 0.052 | A   | T  |
| OSMR    | 5  | 38886321  | rs74696378  | 0.0264 | 0.1341     | 0.145 | A   | G  |
| IL31RA  | 5  | 55908195  | -           | -      | -          | 0.07  | G   | T  |
| IL31RA  | 5  | 55916618  | rs16884641  | 0.2616 | 0.4034     | 0.356 | T   | G  |
| IL31RA  | 5  | 55917195  | rs161699    | 0.6965 | 0.8377     | 0.752 | C   | T  |
| IL31RA  | 5  | 55923058  | rs186560    | 0.3337 | 0.50841121 | 0.386 | C   | T  |
| IL6ST   | 5  | 55936364  | -           | -      | -          | 0.051 | T   | A  |
| FLT4    | 5  | 180601509 | rs72816988  | 0.0427 | 0.1083     | 0.144 | G   | A  |
| FLT4    | 5  | 180601717 | rs307822    | 0.6823 | 0.6088785  | 0.637 | T   | C  |
| FLT4    | 5  | 180601743 | rs2279622   | 0.1837 | 0.2001     | 0.095 | C   | T  |
| FLT4    | 5  | 180602471 | rs6877011   | 0.1717 | 0.393      | 0.215 | C   | G  |
| FLT4    | 5  | 180602616 | rs72816989  | 0.0661 | 0.1218     | 0.157 | G   | A  |
| FLT4    | 5  | 180602879 | rs72816990  | 0.0475 | 0.1215     | 0.149 | G   | A  |
| FLT4    | 5  | 180608069 | rs146943555 | 0.0525 | 0.16915888 | 0.157 | G   | A  |
| FLT4    | 5  | 180608183 | rs150066252 | 0.0351 | -          | 0.08  | AGT | -  |
| FLT4    | 5  | 180608347 | rs2387212   | 0.2115 | 0.24345794 | 0.173 | C   | T  |
| FLT4    | 5  | 180608504 | rs307833    | 0.8892 | 0.82943925 | 0.823 | C   | T  |
| TGFBR1  | 9  | 99150189  | rs334348    | 0.3319 | 0.5769     | 0.592 | A   | G  |
| TGFBR1  | 9  | 99150733  | rs11568811  | 0.0104 | 0.0351     | 0.088 | G   | C  |
| TGFBR1  | 9  | 99152105  | rs334349    | 0.3259 | 0.5752     | 0.645 | G   | A  |
| TGFBR1  | 9  | 99152530  | rs3739798   | 0.1266 | 0.4729     | 0.461 | G   | A  |
| TGFBR1  | 9  | 99152566  | rs117440593 | 0.007  | 0.035      | 0.067 | T   | C  |
| TGFBR1  | 9  | 99152591  | rs420549    | 0.1082 | 0.0678     | 0.111 | G   | C  |
| TGFBR1  | 9  | 99153883  | rs1590      | 0.3299 | 0.575      | 0.657 | T   | G  |
| IL15RA  | 10 | 5952731   | rs2296135   | 0.5667 | 0.4737     | 0.722 | A   | C  |
| IL15RA  | 10 | 5953089   | rs2229135   | 0.0875 | 0.098      | 0.091 | C   | T  |
| IL2RA   | 10 | 6011323   | rs12722604  | 0.094  | 0.3354     | 0.273 | G   | A  |
| IL2RA   | 10 | 6011411   | rs12244380  | 0.3548 | 0.1393     | 0.104 | A   | G  |
| IL2RA   | 10 | 6011605   | rs1570538   | 0.376  | 0.36495327 | 0.33  | C   | T  |
| IL2RA   | 10 | 6013161   | rs10508300  | 0.0725 | 0.0903     | 0.078 | C   | G  |
| IL10RA  | 11 | 118001016 | rs141609122 | 0.0032 | 0.0216     | 0.057 | C   | A  |
| IL10RA  | 11 | 118001371 | rs9610      | 0.5597 | 0.4874     | 0.448 | G   | A  |
| FLT1    | 13 | 28299770  | rs1830792   | 0.1647 | 0.2925     | 0.218 | T   | C  |
| FLT1    | 13 | 28300125  | rs9554312   | 0.0962 | 0.3036     | 0.362 | A   | G  |
| FLT1    | 13 | 28301282  | rs35779457  | 0.2352 | -          | 0.341 | -   | TG |
| FLT1    | 13 | 28301297  | rs55875014  | 0.2352 | 0.3335     | 0.398 | G   | C  |
| FLT1    | 13 | 28301652  | rs9554314   | 0.2388 | 0.3364     | 0.352 | A   | C  |
| FLT1    | 13 | 28302077  | rs7326277   | 0.261  | 0.3248     | 0.374 | T   | C  |
| FLT1    | 13 | 28302136  | rs56791288  | 0.2324 | -          | 0.322 | CTC | -  |
| FLT1    | 13 | 28302820  | rs3812867   | 0.014  | 0.0782     | 0.06  | G   | A  |
| FLT1    | 13 | 28386331  | rs7319123   | 0.9657 | 1          | 0.981 | A   | C  |
| FLT1    | 13 | 28386429  | rs3751396   | 0.0044 | 0.0481     | 0.137 | A   | G  |
| FLT1    | 13 | 28386456  | rs3751397   | 0.4141 | 0.5706     | 0.477 | T   | A  |
| FLT1    | 13 | 28387316  | rs193167358 | 0.0002 | 0.0121     | 0.054 | A   | G  |
| FLT1    | 13 | 28388529  | rs7337610   | 0.4856 | 0.5659     | 0.498 | T   | C  |
| FLT1    | 13 | 28388549  | rs17086617  | 0.2839 | 0.4144     | 0.485 | T   | C  |
| FLT1    | 13 | 28388620  | rs9551465   | 0.4    | 0.48878505 | 0.534 | A   | T  |
| FLT1    | 13 | 28389539  | rs2296284   | 0.2772 | 0.3785     | 0.448 | G   | A  |
| FLT1    | 13 | 28389565  | rs2296283   | 0.4016 | 0.572      | 0.488 | G   | A  |
| FLT1    | 13 | 28390188  | rs7983774   | 0.2792 | 0.3756     | 0.488 | G   | A  |
| IL4R    | 16 | 27362237  | rs3024676   | 0.2808 | 0.0496     | 0.061 | C   | A  |
| IL4R    | 16 | 27362551  | rs1805011   | 0.2364 | 0.0503     | 0.063 | A   | C  |
| IL4R    | 16 | 27362594  | rs2234898   | 0.2356 | 0.0504     | 0.059 | G   | T  |
| IL4R    | 16 | 27362643  | rs1805012   | 0.0881 | 0.0505     | 0.058 | T   | C  |
| IL4R    | 16 | 27362651  | rs2234900   | 0.2634 | 0.0497     | 0.056 | T   | C  |
| IL4R    | 16 | 27362859  | rs1805015   | 0.2017 | 0.0499     | 0.058 | T   | C  |
| IL4R    | 16 | 27363079  | rs1801275   | 0.3754 | 0.1201     | 0.129 | A   | G  |
| IL4R    | 16 | 27363836  | rs2074570   | 0.1196 | 0.0725     | 0.061 | T   | C  |
| IL4R    | 16 | 27364008  | rs563535954 | 0.0002 | 0.0095857  | 0.066 | C   | T  |
| IL4R    | 16 | 27364221  | rs1049631   | 0.4297 | 0.3324     | 0.361 | G   | A  |
| IL4R    | 16 | 27364466  | rs8832      | 0.4429 | 0.4135     | 0.444 | A   | G  |
| IL4R    | 16 | 27364896  | rs1029489   | 0.4559 | 0.4051     | 0.384 | A   | G  |
| IL21R   | 16 | 27449576  | rs2285452   | 0.2258 | 0.1341     | 0.1   | G   | A  |
| IL21R   | 16 | 27449880  | rs2239928   | 0.2254 | 0.1327     | 0.116 | C   | A  |
| IL21R   | 16 | 27450370  | rs2096      | 0.2262 | 0.1309     | 0.084 | C   | G  |
| IL21R   | 16 | 27452127  | rs3093390   | 0.225  | 0.1324     | 0.12  | C   | T  |
| EB13    | 19 | 4236999   | rs4740      | 0.4485 | 0.37897196 | 0.367 | G   | A  |
| EB13    | 19 | 4237070   | rs4905      | 0.4609 | 0.3771028  | 0.365 | A   | G  |
| EB13    | 19 | 4237428   | rs6613      | 0.3842 | 0.38411215 | 0.374 | A   | T  |
| IL12RB1 | 19 | 18059187  | rs404733    | 0.4639 | 0.4453271  | 0.473 | A   | T  |
| IL12RB1 | 19 | 18059574  | rs3746190   | 0.1863 | 0.223      | 0.176 | G   | A  |
| IL12RB1 | 19 | 18059847  | rs12461312  | 0.1785 | 0.224      | 0.277 | C   | A  |
| IL12RB1 | 19 | 18059870  | rs17882555  | 0.1805 | 0.2286     | 0.239 | G   | A  |
| IL12RB1 | 19 | 18060152  | rs1870063   | 0.1805 | 0.2278     | 0.155 | C   | T  |
| IL12RB1 | 19 | 18070759  | rs845380    | 0.6585 | 0.65747664 | 0.724 | A   | G  |
| IL12RB1 | 19 | 18070969  | rs845381    | 0.099  | 0.20140187 | 0.125 | G   | A  |
| IL12RB1 | 19 | 18071140  | rs845382    | 0.0982 | 0.20046729 | 0.121 | A   | T  |
| IL12RB1 | 19 | 18071189  | -           | -      | -          | 0.092 | G   | A  |
| IL10RB  | 21 | 33296442  | rs3171425   | 0.5685 | 0.7973     | 0.697 | A   | G  |
| IL10RB  | 21 | 33296671  | rs8178562   | 0.1921 | 0.46869159 | 0.4   | G   | A  |
| IL10RB  | 21 | 33297076  | rs1058867   | 0.5651 | 0.7895     | 0.708 | G   | A  |
| IL17RA  | 22 | 17108319  | rs879577    | 0.2716 | 0.1007     | 0.17  | T   | C  |
| IL17RA  | 22 | 17108407  | rs2229151   | 0.1122 | 0.27196262 | 0.144 | G   | A  |
| IL17RA  | 22 | 17108677  | rs879575    | 0.1639 | 0.0589     | 0.056 | C   | T  |
| IL17RA  | 22 | 17108904  | rs12484684  | 0.113  | 0.2717     | 0.172 | C   | A  |
| IL17RA  | 22 | 17109379  | rs4819555   | 0.2426 | 0.0968     | 0.157 | C   | T  |
| IL17RA  | 22 | 17109709  | rs3804060   | 0.0304 | 0.0724     | 0.092 | C   | T  |

|        |    |          |            |        |            |       |   |   |
|--------|----|----------|------------|--------|------------|-------|---|---|
| IL17RA | 22 | 17109854 | rs1468488  | 0.28   | 0.1044     | 0.174 | T | C |
| IL17RA | 22 | 17110199 | rs2895332  | 0.731  | 0.7125     | 0.689 | G | A |
| IL17RA | 22 | 17110254 | rs3179921  | 0.5397 | 0.42476636 | 0.463 | C | T |
| IL17RA | 22 | 17110807 | rs882644   | 0.5555 | 0.42850467 | 0.491 | G | A |
| IL17RA | 22 | 17111920 | rs12160599 | 0.0379 | 0.0933     | 0.136 | A | G |
| IL17RA | 22 | 17112164 | rs4563337  | 0.0312 | -          | 0.134 | C | T |
| IL17RA | 22 | 17112795 | rs887796   | 0.8367 | 0.8041     | 0.803 | G | A |
| IL17RA | 22 | 17113582 | rs9606617  | 0.1597 | 0.085      | 0.175 | G | A |
| IL17RA | 22 | 17113882 | rs12484781 | 0.1627 | 0.2933     | 0.171 | T | A |
| IL17RA | 22 | 17113996 | rs738035   | 0.4874 | 0.4248     | 0.541 | T | C |
| IL17RA | 22 | 17114025 | rs738034   | 0.4864 | 0.4126     | 0.489 | G | A |
| IL17RA | 22 | 17114180 | rs5992628  | 0.486  | 0.4144     | 0.499 | T | G |
| IL17RA | 22 | 17114856 | rs1003945  | 0.0333 | 0.0927     | 0.136 | C | T |
| IL17RA | 22 | 17115025 | rs3827278  | 0.1715 | 0.3246     | 0.343 | C | A |
| IL17RA | 22 | 17115039 | rs3827279  | 0.1719 | 0.3232     | 0.325 | G | C |
| IL17RA | 22 | 17115076 | rs1003944  | 0.0415 | 0.0791     | 0.097 | C | T |
| IL17RA | 22 | 17115090 | rs1003943  | 0.0403 | 0.0925     | 0.15  | C | T |
| IL17RA | 22 | 17115288 | rs4819962  | 0.6186 | 0.4248     | 0.594 | T | C |
| IL17RA | 22 | 17115339 | rs1047929  | 0.1971 | 0.0846     | 0.144 | T | C |
| IL17RA | 22 | 17115432 | rs1656     | 0.1715 | 0.3239     | 0.369 | A | G |
| IL17RA | 22 | 17115479 | rs7289055  | 0.0333 | 0.0901     | 0.145 | G | A |
| IL17RA | 22 | 17115498 | rs1654     | 0.8369 | 0.7991     | 0.831 | G | C |
| IL2RB  | 22 | 37125509 | rs58809963 | 0.0717 | -          | 0.242 | G | - |
| IL2RB  | 22 | 37125516 | -          | -      | -          | 0.448 | G | A |
| IL2RB  | 22 | 37127681 | rs228941   | 0.3888 | 0.3629     | 0.294 | C | G |
| IL2RB  | 22 | 37128579 | rs228942   | 0.1803 | 0.2552     | 0.165 | G | T |



|      |    |          |             |        |           |       |     |    |
|------|----|----------|-------------|--------|-----------|-------|-----|----|
| ILAR | 16 | 27362237 | rs3024676   | 0.2808 | 0.0496    | 0.057 | C   | A  |
| ILAR | 16 | 27362551 | rs1805011   | 0.2364 | 0.0563    | 0.054 | A   | C  |
| ILAR | 16 | 27362651 | rs2234900   | 0.2634 | 0.0497    | 0.05  | T   | C  |
| ILAR | 16 | 27362859 | rs1805015   | 0.2017 | 0.0499    | 0.057 | T   | C  |
| ILAR | 16 | 27363079 | rs1801275   | 0.3754 | 0.1201    | 0.101 | A   | G  |
| ILAR | 16 | 27364008 | rs563535954 | 0.0002 | 0.0095857 | 0.076 | C   | T  |
| ILAR | 16 | 27364221 | rs1049631   | 0.4297 | 0.3324    | 0.389 | G   | A  |
| ILAR | 16 | 27364466 | rs8832      | 0.4429 | 0.4135    | 0.467 | A   | G  |
| ILAR | 16 | 27364896 | rs1029489   | 0.4559 | 0.4651    | 0.352 | A   | G  |
| ILAR | 16 | 27365316 | rs2382721   | 0.3474 | 0.5964    | 0.601 | A   | G  |
| ILAR | 16 | 27365589 | rs3024685   | 0.5473 | 0.5969    | 0.624 | T   | C  |
| ILAR | 16 | 27365690 | rs35146330  | -      | -         | 0.642 | -   | C  |
| ILAR | 16 | 27365843 | rs72064218  | 0.5471 | -         | 0.602 | TGA | -  |
| ILAR | 16 | 27366463 | rs368508458 | -      | -         | 0.929 | A   | -  |
| ILAR | 16 | 27366471 | rs572510621 | 0.0008 | -         | 0.071 | -   | AC |
| ILAR | 16 | 27366732 | rs12102586  | 0.1308 | -         | 0.058 | C   | T  |



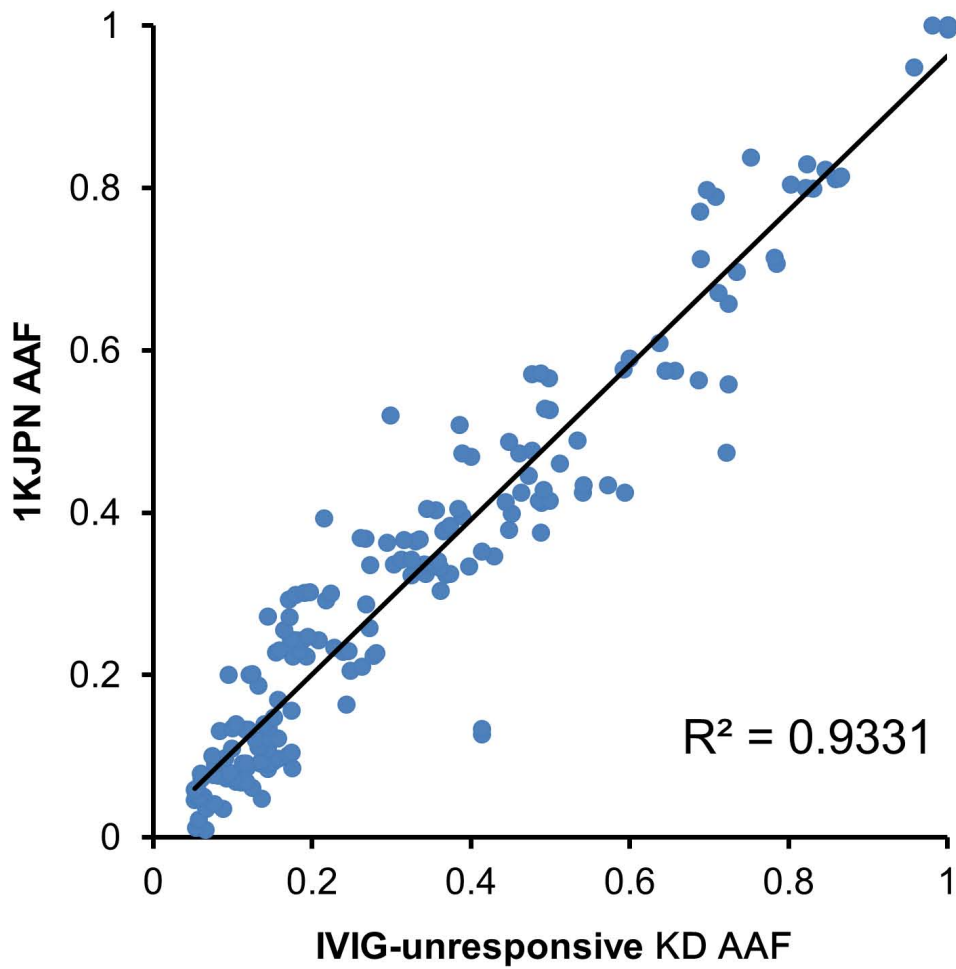

**Supplementary Figure 1.** Pairwise correlation between AAFs of SNVs, estimated via pooled genome sequencing of IVIG-unresponsive KD patients, in the gene loci of cytokine receptors and AAFs found in 1KJPN. The square of Pearson's correlation coefficient,  $R^2=0.9331$ .

A

PCR product with the reference allele of rs563535954

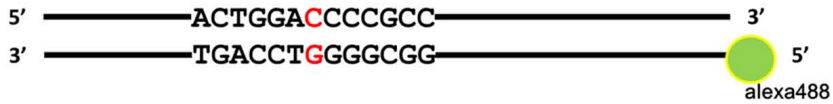

PCR product with the minor allele of rs563535954

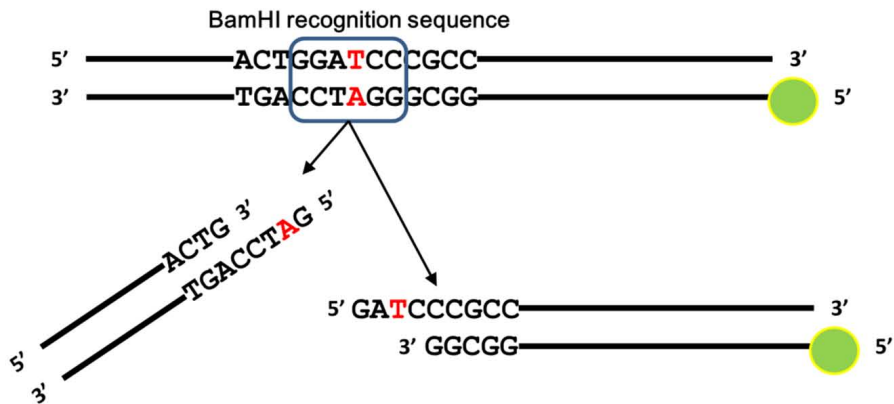

B

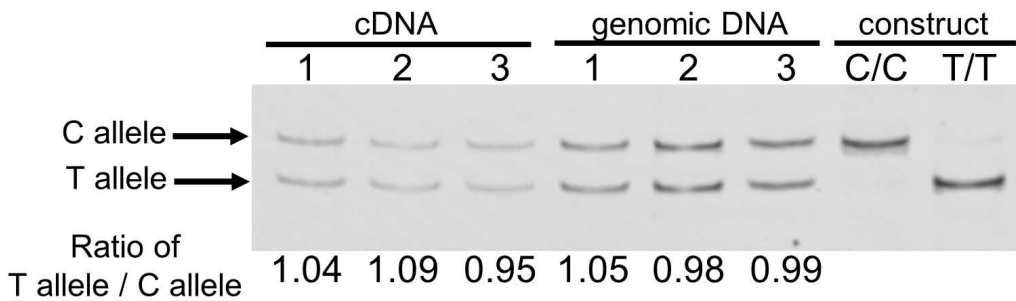

**Supplementary Figure 2.** Allele-specific transcript quantification of *IL4R* in PBMCs from IVIG-unresponsive KD patients with heterozygous rs563535954. (A) Schematic diagram of the separation-detection method of *IL4R* transcripts derived from an allele with or without the minor allele of rs563535954 based on PCR-restriction fragment length polymorphism (PCR-RFLP). PCR products derived from the minor allele of rs563535954 (T) and the counterpart allele (C) can be distinguished by *Bam*HI digestion. Homoduplex products are labelled with Alexa-488. (B) Comparison of the abundance of *IL4R* transcripts between those with or without the minor allele of rs563535954 in PHA stimulated PBMCs from KD patients with heterozygous rs563535954. Numerals indicate individual patients. PCR products amplified from genomic DNA indicate an equal ratio between the alleles. PCR products amplified from constructs were used as controls for specific digestion (C/C) and complete digestion (T/T) by *Bam*HI. The fluorescence ratio of Alexa-488 labelled fragments derived from the minor allele of rs563535954 (T) and the counter allele (C) are indicated at each line. Image presented in this panel was cropped to remove surrounding white space.

A

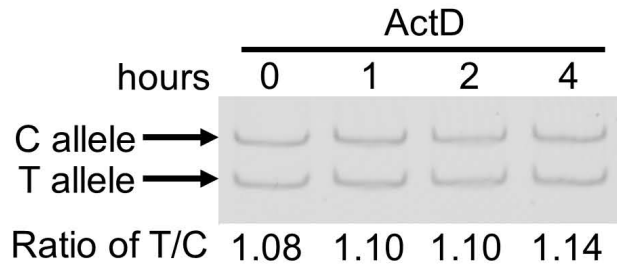

B

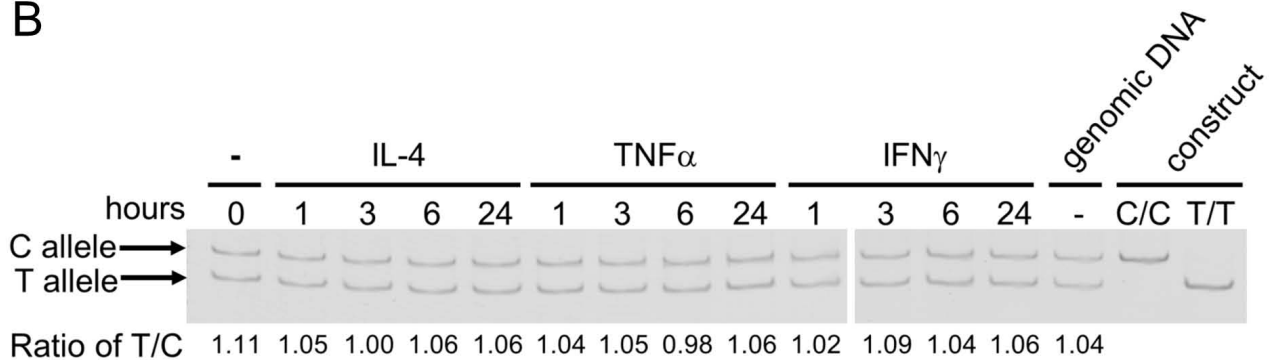

**Supplementary Figure 3.** Allele-specific transcript quantification of *IL4R* in B-LCLs derived from individuals with heterozygous rs563535954. B-LCLs derived from individuals with heterozygous rs563535954 were incubated with or without Actinomycin D (A), IL-4, TNF $\alpha$  or IFN $\gamma$  (B) for the indicated times. The abundance of *IL4R* transcripts between those with or without the minor allele of rs563535954 was compared by a PCR-RFLP-based method under each of the conditions. PCR products amplified from genomic DNA indicate an equal ratio between the alleles. PCR products amplified from constructs were used as controls for specific digestion (C/C) and complete digestion (T/T) by *Bam*HI. The T/C ratio represents the mean values of the fluorescence ratio of Alexa-488 labelled fragments derived from the minor allele of rs563535954 (T) and the counter allele (C) obtained from three B-LCL cell lines. Images presented in this panel were cropped to remove surrounding white space.

A

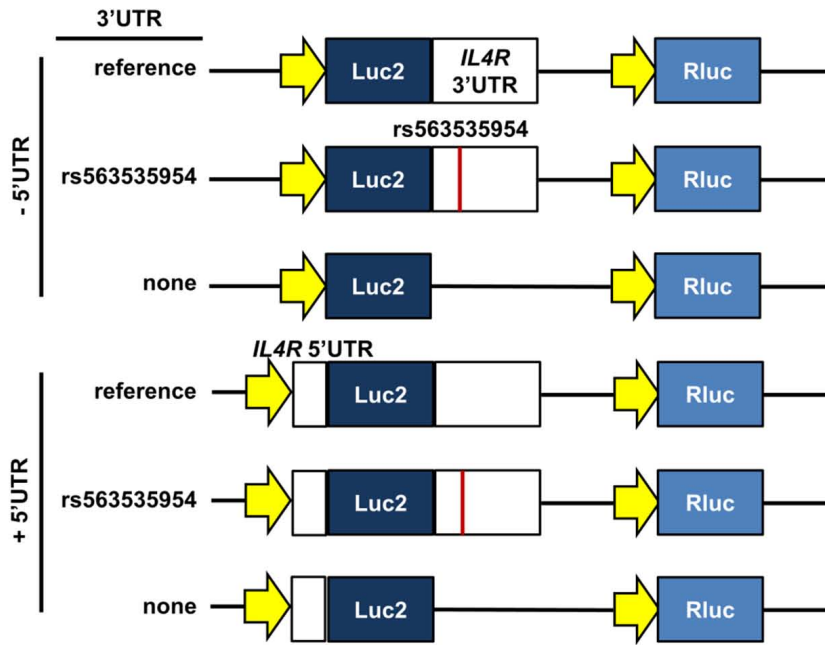

B

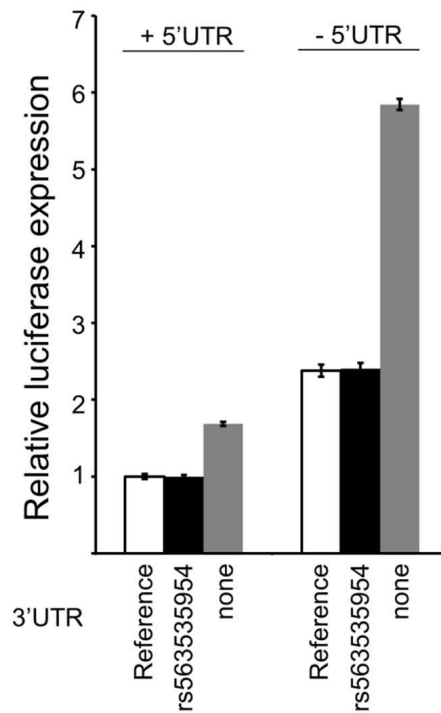

**Supplementary Figure 4.** Effect of the minor allele of rs563535954 on translational efficiency. (A) Dual luciferase expression constructs used in this assay are shown. (B) HEK293T cells were transfected with dual luciferase expression constructs (pmirGLO) as indicated, and the cells were incubated for 24 hours and then harvested for dual luciferase assay. Error bars represent the s.d. from five independent replicates.

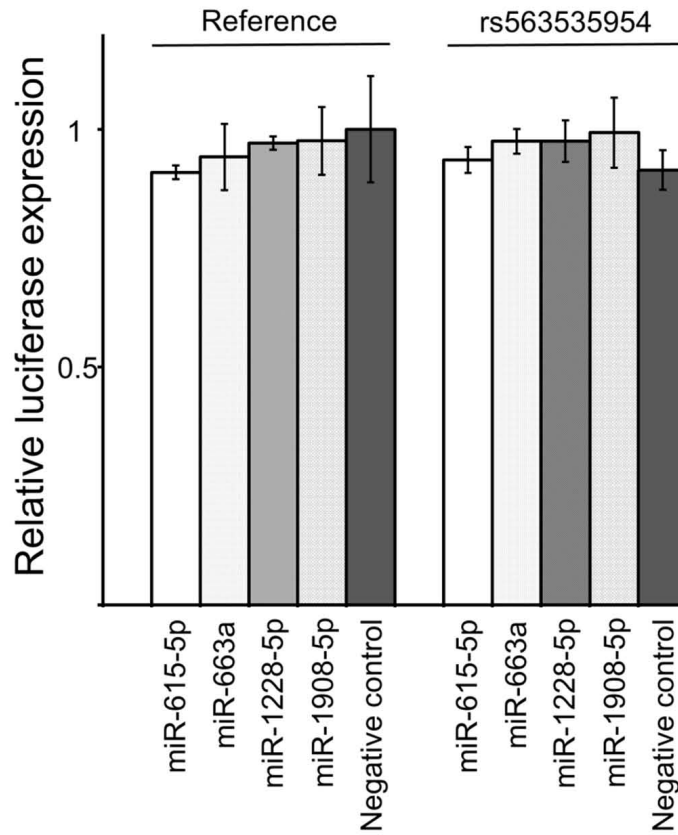

**Supplementary Figure 5.** The effect of miRNA mimics on the activity of luciferase expressed from a reporter plasmid containing the 3'-UTR of IL-4R $\alpha$ . HeLa cells were co-transfected with a pmiRGLO luciferase reporter plasmid containing the 3'-UTR of IL-4R $\alpha$ , with or without the minor allele of rs563535954 and miRNA mimics, as indicated. Cells were harvested for assessment via dual luciferase assay after 24 hours of incubation. Error bars represent the s.d. from four independent replicates.

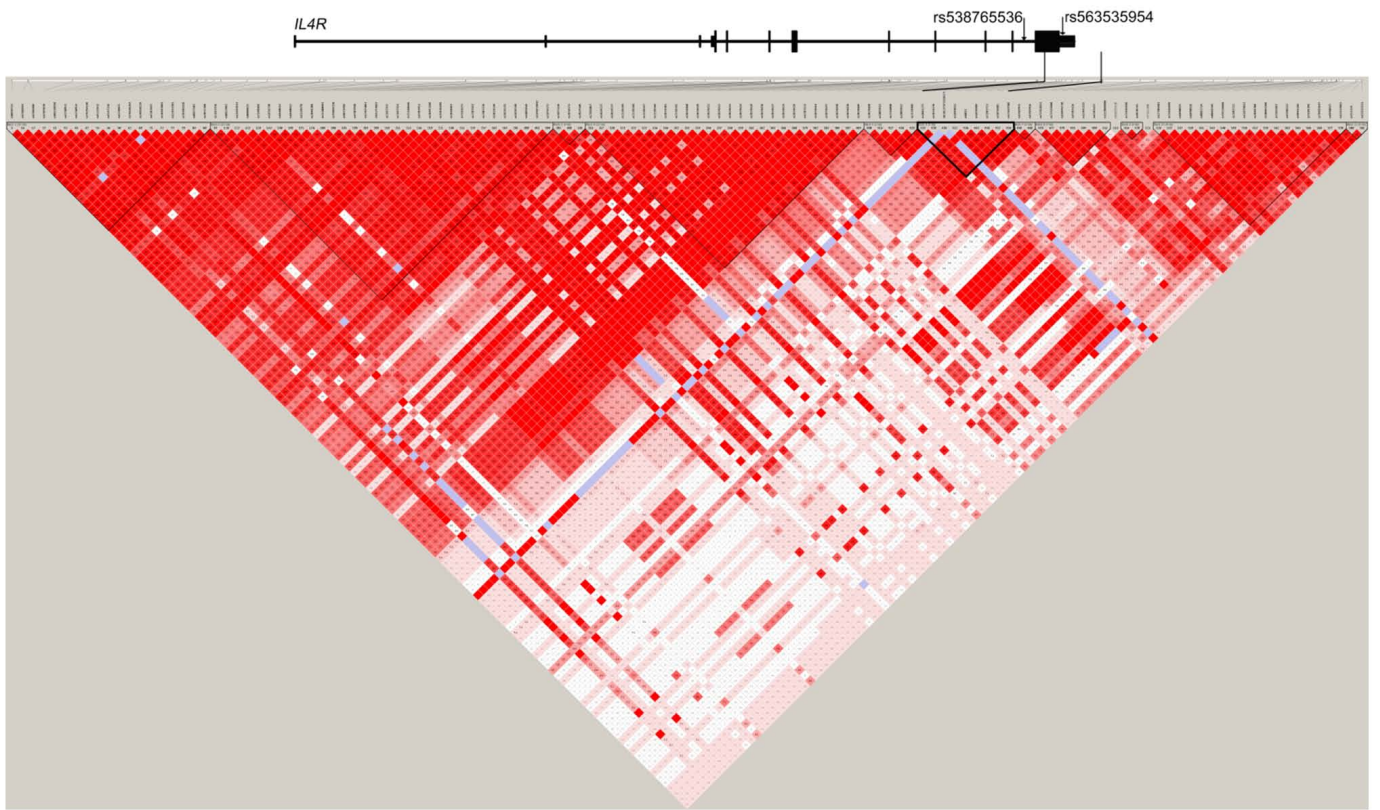

**Supplementary Figure 6.** Linkage disequilibrium (LD) plot around the *IL4R* gene locus and *IL4R* gene structure. The LD block is based on the identified variants in 1KJPN (AAF >0.05). Haplotype block containing rs563535954 is surrounded by a bold line. Location of rs563535954 and rs538765536 are shown on the schematic diagram of the *IL4R* gene.

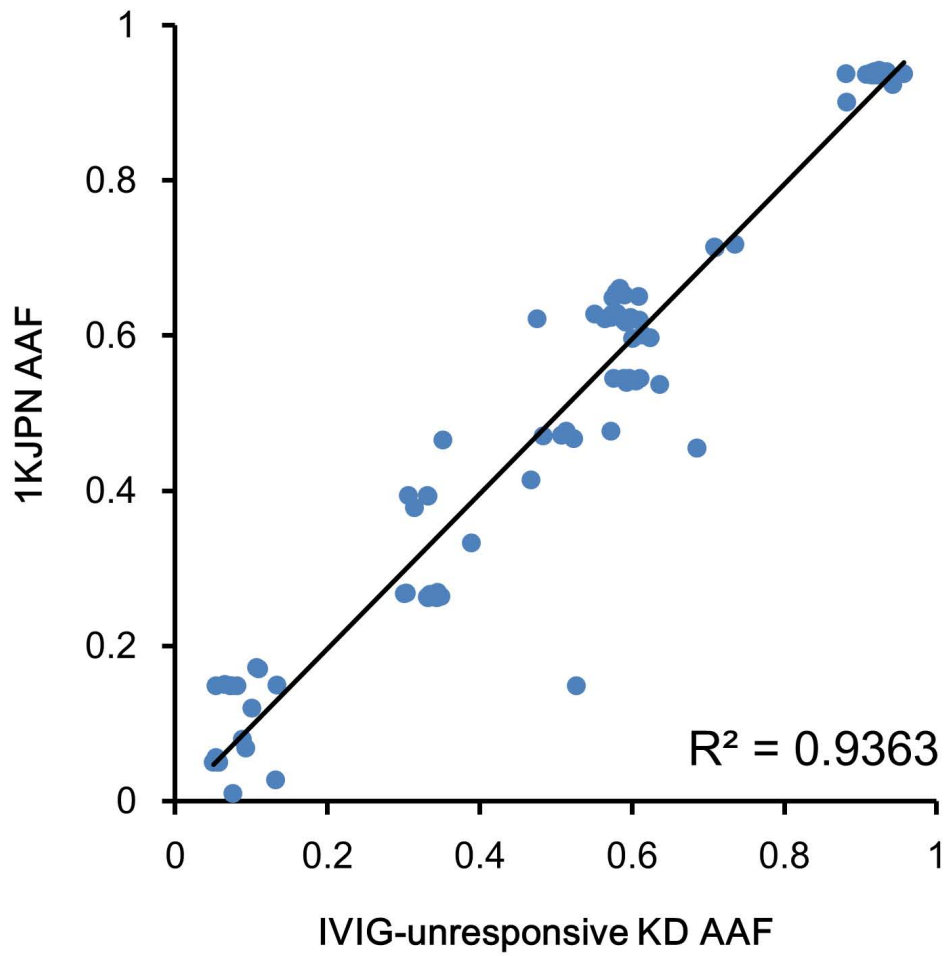

**Supplementary Figure 7.** Pairwise correlation between the AAFs of SNVs, estimated via the pooled genome sequencing of IVIG-unresponsive KD patients, in the *IL4R* gene locus including the LD block with rs563535954 and AAFs of that found in 1KJPN. The square of Pearson's correlation coefficient,  $R^2=0.9363$ .
